# Supplementary material
Source: PubMed Central journal article supplement (PMC6146992)
Supplement: zam019188781s1.pdf [file zam019188781s1.pdf]

Figure S1

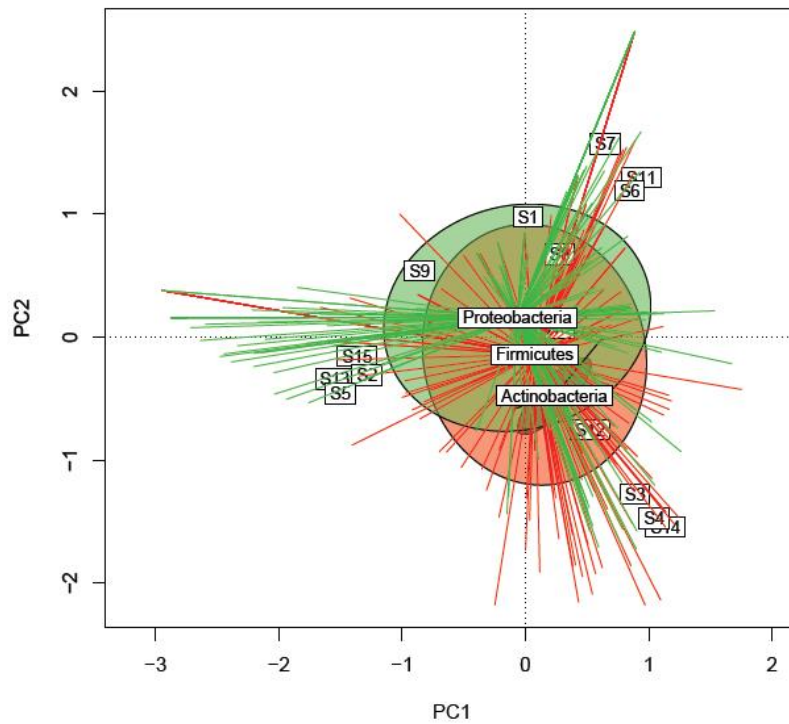

**FIG S1.** Principal component analysis results at the genus/species composition among samples from the human gut microbiota of athletes

Figure S2

```

LRH      -----MTASPWDLRKVLDELKQDPQQYHETDVQVDPDAELAGVYRYIGAGGTV
LPL      -----MAEQPWLRRVLDEIKDDPKNYHETDVEVDPNAELSGVYRYIGAGGTV
PET      -----MAKKDVYDLRKVLDELKKEPGQYHETNVEVDPDAELSGVYRYIGAGGTV
ERA      -----MSTPYDLRKVLAELEQEMPGEYHETNVEVDPHAELSGVYRYIGAGGTV
SGA      -----MSEQPYDLRKVLEELKEIPGQYHETDVEIDPNAEISGVYRYIGAGGTV
ECL      -----MQNPINDLRSALALLQRHPGHYIETDHPVDPNAELAGVYRHIGAGGTV
ACH      MEQP---FPAFIDFPPINDLRSALARLQQVPGQLLHTDHPVDPHGELAGVYKRVGAGGTV
KIN      ----MNRTDHTANSPVIDLRSALARLEQSPDELISTDHEIDPRSELAGVYKRVGAGGTV
ATR      MEDNVMDRTDHAANSPIVIDLRSALARLEAFPGELISTDQEVDPSELAGVYKRVGAGGTV
AGL      -----MNDTIHDLRSALDYLRDMPGQLLETDTDEVDCDAEVSQVYRHHVAGGTV
ERY      -----MKEPYDLRSALQQLEAEEGQLLITDKLTNTDDELAGVYRYIGGGGTL
COP      -----MSKKKVRDLRSALALLQSIDGQLVETDVEVDPPLGELSGVYRHHVAGGTV
BLA      -----MAEKVRDLRSALALLQMPDQLIETEVEVDPMAELAGVYRHHVAGGTV
FIR      -----MADKVRDLRSALERLKTMEGQYIETDVEVDPMAELAGVYRYVAGGTV
AHA      -----MQDKVRDLRSALKRKLQMEGQYIETDVEVDPMAELAGVYRYVAGGTV
LAC      -----MQDKVRDLRSALKRKLQMEGQYIETDVEVDPMAELAGVYRYVAGGTV
DLO      -----MAAKVTDLRSALKMLEDMPGQLIETDVEVEPMAELSGVYRHHVAGGTV
IBA      -----MNKVRDLRSALALLNMPGQLIETDVEVDPMAELSGVYRHHVAGGTV
CBU      -----MSNKVYDLRSALALLKTLPGQLIETDVEVDPMAELAGVYRYVAGGTV
HHA      -----MVEDLRSAVEELKKYENQIACDTEVDSYAEVAGIYRYVAGGTV
TSA      ---MKIKERVNKMANQIHDLRSAIEFLKQHENQIVYTNSEVDCEAEISGIYRYVAGGTV
PAG      -----MSGKESKVNDLRSALALLSQYDNELIYTDPEVDPVAELSGVYRYVAGGTV
HAL      ----MANNADNKIKNP IHDLRSALIEFLKNQPGELVSTNVEVDPCAELSGVYRYVAGGTV
SBL      -----MKNKDKIPVHDLRSALALLKTLPGEYVETFTVEVDPHAELSGVYRYVAGGTV
KRA      ----MSNSENKNTSGVTDLRSALIEFLKTLPGEYVETDTEVDPHAELSGVYRYVAGGTV
KMI      ----MANS DNKTPSSVHDLRSALALLKTLPGEYVETDTEVDPHAELSGVYRYVAGGTV

```

\*\*\* .: : . \* : .\*:\*:\*: :\*. \*\*

```

LRH      ERPTQ-EGPAMMFNNVVGFPTRVLIIGLMSRKRKRVGKMFHQDYHTLGRFLNKAVLNPIQP
LPL      QRPTQ-EGPAMMFNNVKGFPDTRVLTGLMASRRRVGKMFHHDYQTLGQYLNEAVSNPVAP
PET      QRPTQ-EGPAMMFNNVKGFPDTRVLMGLMASRKRKRVGKMFHHDYHTLGQFLNDSVENPVDP
ERA      KRPTK-EGPAMMFNCVKGFDPTRVLIGI IASRDRVGKILHHDPKHLGRLLKDSVQNPVKP
SGA      ERPTQ-EGPAMTFNNIKGFPNVRVNI GTMASRKRVGHI LHHDYKDLGHLNKAVERNPKP
ECL      KRPTR-TGPAMMFNSVKGYPGSRILVGMHASRERAALLGCVPSKLAQHVQAVKNPVAP
ACH      KRPTR-LGPAMMFNHKIGYPDSRVLVGMASRERVALLLDTPDRLAERMGEAIEKAIDP
KIN      MRPTR-TGPAMMFENVKGYPGARVLVGLMAKRERVALLLDSRPEELGRRMGEAVLNGIAP
ATR      MRPTR-TGPAMMFENVKGYPGARVLVGLMAKRERVALLLDSKPEELGQRMGEAVLNGIAP
AGL      ARPTK-EGPAMVFNNVKGFDKVAIGLLSSRKRVAALLGMDEQYLGQLIGQKLAETIPP
ERY      QRPTQ-LGPAMLFTNIQNHPGSRVLIGLLGDRQRCASLLNTTSEQLPFLMNKAYSKRLLDP
COP      MRPTQ-EGPAMIFNHVKGHPGARVAIGLLASRRRVGYLLDCEPQKLGFLKDSVNNPIKP
BLA      KRPTK-EGPAMIFNRKIGHPDARVAIGLLASRKRVAALLDTPENLGMMLCKSVENPIPP
FIR      KRPTK-EGPAMVFNNVKGHKDARVAIGVLASRKRVAALLDCKPEELGKKLYHSVDNPIPP
AHA      KRPTK-EGPAMVFNNVKGHKDARVAIGVLASRKHVAALLDCKPEELGKKLYHSVDNPIAP
LAC      KRPTK-EGPAMVFNNVKGHKDARVAIGVLASRKRVAALLDCKPEELGKKLYHSVDNPIAP
DLO      MRPTK-EGPAMIFNNVKGHPGARVAIGVLASRTRVGALLECDPKDLGKKLYHSVDNPIPP
IBA      QRPTK-EGPAMIFNNVKGHKDARVLI GLLASRKRVAALLGTEPEDLGKLLYHSVDNPIPP
CBU      QRPTK-EGPAMIFNNIKGHKDARVLI GLLASRRRVAALLDCEPENLGMMLCKSVENPIPP
HHA      KRPTK-EGPALLFRNIKGFDPKQVLIGLLASRKRVGYLLDCCPPDKLGFLLKDAANPVMP
TSA      MRPTK-IGPAMLFNHVKDYEHKSVLIGL FASRERVGLMLGCEPDRLGFLNLDALNHPVDP
PAG      KRPTR-VGPAMVFNKIKGFNDMRVLIGLLSSRQRVARLFGTSPENLAFMLKDSVLNPIPP
HAL      QRPTRKNGPAMVFNKIKGFDDISVTIGLNGSRKRKRVGHFLNCAPELGHLLKDSVKNAIQP
SBL      QRPTRKNGPAMVFHNKIGFRNTNVAIGLNGSRKRKRVGHFLNCAPEKLGFLKDSVKHAIAP
KRA      QRPTRKNGPVMVFNKIKGFQDISVAIGLNGSRKRKRVSHFLNCAPEKLGHLKDSVQNPPIPP
KMI      QRPTRKNGPVMVFNKIKGFKDISVAIGLNGSRQRVSHFLQCEPAKLGHLKDSVENAIAP

```

\*\*\*: \*\*. : \* : .. : \* ..\* : . : : \* : . : \*

LRH VTVE-ESAAPAHEVVAKASDPDFDIRKLVAAPTNTPQDAGPYITCGVVLGSNMAK-TMTD  
LPL ETVA-EADAPAHDVVYKATDEGFDIRKLVAAPTNTPQDAGPYITVGVVFGSSMDK-SKSD  
PET VMVD-EADAPTHEVVHKSTDAADFDIRKLVAAPTNTPRDAGPYITVGVVYGSNPK-TMSD  
ERA VKVA-KTDAPAQEVVHLATDEGFDIRKILAAPTNTEYDAGPYITMGVVFVGSNDPK-TMSD  
SGA VKVS-KDQAPAQEVVHLATDDDFDIRKILAAPTNTEYDAGPYITGLVYGSTPDK-SMSD  
ECL VVVP-ASQAPCQEQVFYADDPDFDLRKLPAPTNTPIDAGPFFCLGLVLASDPEDTSLTD  
ACH VVVP-REQAPCQEQVHRAEDPGFDLRKLPAPTNTEEDAGPFFCLGLVLASDPEDTSLTD  
KIN VVLK-GQSAPCQEQIFRADDPHFDLRNLLPAPTNTEEDAGPYFCLGLLLGSDDPN-GHTD  
ATR VVFK-EGSAPCQEQVFRADDPNFDLRHLLPAPTNTEEDAGPYFCLGLLLGSDDPN-GHTD  
AGL APIAEGKHIDCQEVVHLATDPDFDLRRLVPAPTNTPEDAGPYVTMGLIAGHSPFN-SDTD  
ERY VVVA---KGICQEQIVHREDEGFDIRRLLPAIKATKEDAGPYITMGLCYASEPET-KESD  
COP VVIP-HEQAKCQEVKYFADDPDFDIRKLVPAPTNTEEDAGPYITLMGCIYASSPET-GESD  
BLA VDLE-G-DAPCQQVHKAADPDFDLYKLVPAPTNTPDDAGPYITLMGCIYATHPDT-GVHD  
FIR VEYQ-G-APPQQVHKAADPDFDLYKLVPAPTNTPDDAGPYITLMGCIYATHPDT-GVHD  
AHA VEYQ-G-DAPCQQVHKAADPDFDLYKLVPAPTNTPDDAGPYITLMGCIYATHPDT-GVHD  
LAC VEYQ-G-DAPCQQVHKAADPDFDLYKLVPAPTNTPDDAGPYITLMGCIYATHPDT-GVHD  
DLO VLTE-EA-APCQEVVHKATDPDFDLYKLVPAPTNTPVDAGPYITLMGCIYASHPDT-GVSD  
IBA VLTD--KTPLCQEVVHRATDEDFDLYKLVPAPTNTPDDAGPYITLMGCIYASHPDT-GCSD  
CBU VLTD-AKLPLCQQVHKAADPDFDLNKLPAPTNTPDDAGPYITLMGCIYASHPDT-KFSD  
HHA EFTE-SGDVPCQEEIHYASDEGFDIRKILPAPQNTTEEDAGPYITMGCIYASDPVT-GDGD  
TSA IEIP-QAKAKCQEVVHLSTDEGFDIRKILPAPKNTLEEDAGPYITMGLCYASDPDT-KAGD  
PAG IVIP-REHAVCQEVVHLATDPDFDILKILPTPTNTEEDAGPYITLMGCIYAADPET-GEHD  
HAL VTVS-ADKAVCQQVTHFAEDADFDLRKLPAPTNTEEDAGPYITMGLCYASDPDT-HESD  
SBL VDVS-TGNAVCQEVVHLATDPDFDLRKLPAPTNTEEDAGPYITMGLCYASDPDT-HESD  
KRA IL-T-KDNAVCQQVHLASDTNFDLRKLPAPTNTEEDAGPYITMGLCYASDPET-HESD  
KMI VM-A-QGAAVCQQVHLASADDFDLRKLPAPTNTEEDAGPYITMGLCYASDPET-HESD  
:: \* \*:: :: : \* \*\*\*\*:. \*: . \*

LRH VTIHRMVLEDKDTLGIYIMPGGRHIGHFAEEYEKANKPMPVTINIGLDPAITIGATFEPF  
LPL VTIHRMVLEDKDKLGIYIMPGGRHIGHFAEEYEKANKPMPITINIGLDPAITIGATFEPF  
PET VTIHRMVLEDKDKLGIYIMPGGRHIGHKFAEEYEKMNKMPITINIGLDPAITIGATFEPF  
ERA VTIHRMVLEDEDTIGMYIMPGGRHIGHFQKQYALNKMPITINIGLDPAISIGTTFEPF  
SGA VTIHRMVLEDKDTIGIYIMPGGRHIGHAFLESEYQKLNKMPITINIGLDPAILIGATFEPF  
ECL VTIHRLCVQERDELSMFLAAG-RHIEVFRKKAEEAGKPLPVTINMGLDPAIYIGACFEAP  
ACH VTIHRLCVQGRDRLSIFFAPD-RHIDKFRQKAEAGKPLPVTINMGLDPAILIGSCFEAP  
KIN VTIHRLCVQGRDELSVFFAPG-RHIDAFRAKAEERGEALPITINMGLDPAIPIGACFEAP  
ATR VTIHRLCVQGRDELSVFFAPG-RHIDAFRAKAEERGEALPITINMGLDPAIPIGACFEAP  
AGL VTIHRLCIESKDTMGMWITPGSRHLGAFFEQWKEKGEDMPVTVSIGLDPAVYMCAGFEAP  
ERY VTIHRLCLQSKDEMTMFFTPGIRHLDVFRKKAEEAKNKALPISISIGVDPALIEIACFEPP  
COP VTIHRMCFQSKDEISIFLQPGARHIGYFRELAEAKGEALPISISIGVDPALIEIACFEAP  
BLA VTIHRLCIQKDELSIFFTPGARHIGAMAERAEELGQRLPISISIGVDPALIEIACFEPP  
FIR VTIHRLCIQKDELSIFFTPGARHIGAMAERAEELGQKLPISISIGVDPALIEIACFEAP  
AHA VTIHRLCIQKDELSIFFTPGARHIGAMAERAEELGQKLPISISIGVDPALIEIACFEAP  
LAC VTIHRLCIQKDELSIFFTPGARHIGAMAERAEELGQKLPISISIGVDPALIEIACFEAP  
DLO VTIHRLCIQKDELSIFFTPGARHIGAMAERAEELGQRLPISISIGVDPALIEIACFEPP  
IBA VTIHRLCIQSKDELSIFFTPGARHIGAMAERAEELGQKLPISISIGVDPALIEIACFEPP  
CBU VTIHRLCIQKDELSIFFTPGARHIGAMAERAEELGQNLPLISISIGVDPALIEIACFEPP  
HHA VTIHRLCLQSADEMTMFFTPGVRHLDAFREKAEREGVNLPLISISIGVDPALIEIACFEPP  
TSA ITIHRMLCQSKDELTMFFTPGVRHLDAFREKAEREGVNLPLISISIGVDPALIEIACFEPP  
PAG VTIHRLCVQSKDEISMYFVPG-RHLDTFRQKAEAGKPLPITISIGVDPALIEIACFEPP  
HAL ITIHRMLCVQSRDELSMWLTPG-RHIDAFRMAEAGKPLPISISIGVDPALIEIACFEPP  
SBL ITIHRMLCVQSKDELTMWLTPG-RHIDAFRIKAEAGKALPISISIGVDPALIEIACFEPP  
KRA ITIHRMLCVQSRDELSMWLTPG-RHIDAFRMAEAGKPLPISISIGVDPALIEIACFEPP  
KMI ITIHRMLCVQSRDELSMWLTPG-RHIDAFRMAEAGQPLPISISIGVDPALIEIACFEPP  
:\*\*\*\*: .: \* : :: . \*\*: : : :\*:::.\*:\*\*\*\*: : : \*\* \*

LRH TTPPLGYDELGVAGAIRQEPVQLVQAVTVDEKAIARSEFTLEGYIMPNTRIQEDINTHTGK  
LPL TTPFGYNELGVAGAIRNQAVQLVDGVTVDEKAIARSEYTTLEGYIMPNERIQEDINTHTGK  
PET TTPPLGYNELGVAGAIRQEPVQLVKGLTVDEKAIARSEYTTLEGYIMPNERIQEDINTHTGK  
ERA TTPPLGYNELWVAGALRQEPVQLVDGVAVDEVGIARSEFIIIEAEILPHETIQEDINTNTGK  
SGA TTPPLGYNELWVAGALRNEPVQLVDSIAVDEVGIARSEFIIIEGELLPNETIQEDINTHTGH  
ECL TTPFGYNELGVAGALRQQPVQLVQGVAVKEKAIARAEIIIEGELLPGVRVREDQHTNTGH  
ACH TTPPLGYDELKIIAGGLRGRPVLEVAVSIGQKAIARAEVIEGELLPHERLREDINTDSDGR  
KIN TTPPLGFDELTVAGGLRGRAVELVDAVTVKERSIARAEIVIEGELIPGRRIREDVNTNTGH  
ATR TTPPLGFDELTVAGGLRGRAVELVDAVTVKERSIARAEIVIEGELIPGRRIQEDVNTNTGH  
AGL TTPPLGYNELQIAGGIRGRAVELAPALTVPETCIAHAAYVIEGYLSITDVTVREDVNTNTGK  
ERY TTPPLGFNELSIAGGIRNKPVLELCKCVS IDEYAI AHSEYVIEGELLPGKRMREDQHTGLGK  
COP TTPPLGYDELQVAGAIRNEPVLEVECLTINERAIANAAYVIEGELIPGKRIREDIHSNTGK  
BLA TTPPLGYDELSVAGALRKEPVLELCKCLTVNERAIANAAYVIEGEVIPGVRVKEDQNSNTGY  
FIR TTPPLGYDELAVAGALRNEPVLELCKCLTVNEMAIANAAYVIEGEVILNVRVQEDQNSHTGY  
AHA TTPPLGYDELSVAGALRNEPVLELCKCLTVNEMAIANAAYVIEGEVIPNVRVQEDQNSHTGY  
LAC TTPPLGYDELSVAGALRNEPVLELCKCLTVNEMAIANAAYVIEGEVIPNVRVQEDQNSHTGY  
DLO TTPMGYDELAVAGALRGEVRLCKCLTVNERAIANAAYVIEGEVVPNVRVQEDQNSHTGY  
IBA TTPMGYDELAVAGALRGEAVELCNCLTVNEKAIANAAYVIEGEVIPNVRVQEDQNSHTGY  
CBU TTPPLGYDELSVAGALRGPVLELCKCITVNERAIANAAYVIEGEVIPNLRVQEDKNSNTGY  
HHA TTPPLGFNELSIAGALRKKPVRMAKCRITIDEYAIANAAYVIEGELVAGKRMREDINTNTGK  
TSA ATPLGFNELSIAGGLRGPVLELTKCLTIDEMAIANAAYVIEGELVFGQRMREDINTNTGK  
PAG TTPPLGFDELTVAGALRQAVELVDCCLTVNARGIANAEIVIEGELVPNYRVREDQNTNTGK  
HAL TTPPLGFDELTVAGALRQAVELVDCCLTVNARGIANAEIVIEGELLPNLRVREDQNTNTGK  
SBL TTPPLGFNELSIAGALRGRAVEMVQCKTINEKAI AHAEIVIEGELLPDVRMQEDINTHTGR  
KRA TTPPLGFDELTVAGALRQAVELVDCCLTVNARGIANAEIVIEGELLPNLRVREDQNTNTGK  
KMI TTPPLGFNELSIAGALRQAVEMVQCKTINEKAI AHAEIVIEGELRPNARVREDQNTHTGR  
\*\*\*:\*\*\*:\*\*\* :\*\*\*:\* . \*.: : : \*\*:\* :\* . : :\*\*\* : \*

LRH AMPEFFPGYDGDANPALQVIKVTAVTHRRDHPIMQSVIGPSEEHVSMAGI PTEASILQLVD  
LPL AMPEFFPGYDGDANPALQVIKVTAVTHRK-NAIMQSVIGPSEEHVSMAGI PTEASILQLVN  
PET AMPEFFPGYDGDANPALQVIKVTAVTHRK-DPIMQSVIGPSEEHVSMAGI PTEASILSLTN  
ERA AMPEFFPGYDGDANPAVN VVKVKAITHRKDRPIMQTTIGPSEEHVSMAGI PTEASILDLDV  
SGA AMPEFFPGYDGDANPALNVIKVKAVTHRKDNPI MQTTIGPSEEHVSMAGI PTEASILNLVD  
ECL AMPEFFPGYDGDANPNSLPVIKVKAVTMRN-HAILQTLVGPGEHHTLAGL PTEASIRNAVE  
ACH AMPEFFPGYDGDANPNSLPVIRVAVTMRR-QAILQTLVGPGEHHTNLAGI PTEASIRNAVE  
KIN AMPEFFPGYDGDANPALPVIKVKAVTMRK-NAILQTLVGPGEHHTNLAGI PTEASIFNACD  
ATR AMPEFFPGYDGDANPNSLPVIKVTAVTMRK-NAILQTLVGPGEHHTNLAGI PTEASIFNACD  
AGL AMPEFFPGYDGDANPNSLPVIRVAVTMRR-HPIMQSVIGPSEEHVSMAGI PTEASIKMVE  
ERY AMPEFFPGYDGDANPNSLPVIRVKAITHRK-NPIMRVCLGPGEHHTNLAGI PTEASILSLCE  
COP AMPEFFPGYDGDANPNSLPVIRVAVTMRK-NPIMQTCIGPSEEHVSMAGI PTEASILTMVD  
BLA AMPEFFPGYDGDANPNSLPVIRVAVTMRK-NPIMQTCIGPSEEHVSMAGI PTEASISYGMVE  
FIR AMPEFFPGYDGDANPNSLPVIRVAVTMRK-NPIMQTCIGPSEEHVSMAGI PTEASISYGMVE  
AHA AMPEFFPGYDGDANPNSLPVIRVAVTMRK-NPIMQTCIGPSEEHVSMAGI PTEASISYGMVE  
LAC AMPEFFPGYDGDANPNSLPVIRVAVTMRK-NPIMQTCIGPSEEHVSMAGI PTEASISYGMVE  
DLO AMPEFFPGYDGDANPNSLPVIRVAVTMRK-NPIMQTCIGPSEEHVSMAGI PTEASISYGMVE  
IBA AMPEFFPGYDGDANPNSLPVIRVAVTMRK-NPIMQTCIGPSEEHVSMAGI PTEASISYGMVE  
CBU AMPEFFPGYDGDANPNSLPVIRVAVTMRK-NPIMQTCIGPSEEHVSMAGI PTEASISYGMIE  
HHA AMPEFFPGYDGDANPNSLPVIRVAVTMRK-NPIMQTCIGPSEEHVSMAGI PTEASILTMEE  
TSA AMPEFFPGYDGDANPNSLPVIRVAVTMRK-NPIMQTCIGPSEEHVSMAGI PTEASILNMVE  
PAG AMPEFFPGYDGDANPNSLPVIRVAVTMRK-NPIMQTCIGPSEEHVSMAGI PTEASILQMI  
HAL AMPEFFPGYDGDANPNSLPVIRVAVTMRK-NPIMQTCIGPSEEHVSMAGI PTEASILDMVE  
SBL AMPEFFPGYDGDANPNSLPVIRVAVTMRK-NPIMQTCIGPSEEHVSMAGI PTEASILDMVE  
KRA AMPEFFPGYDGDANPNSLPVIRVAVTMRK-NPIMQTCIGPSEEHVSMAGI PTEASILDMVG  
KMI AMPEFFPGYDGDANPNSLPVIRVAVTMRK-NPIMQTCIGPSEEHVSMAGI PTEASILDMVE  
\*\*\*\*\* \* .. : : : . \* \* \* : : : \* \* . \* \* . : \* \* : \* \* \* \* \*

LRH RAI PGKVKNVYNPPAGGGKLMTIMQIHKDNPADEGIQRQAALLAFSAFKEKLTWLV VDDD  
LPL RAI PGKVTNVYNPPAGGGKLMTIMQIHKDNEADEGIQRQAALLAFSAFKEKLTVIL VDED  
PET RAI PGKVLNVYNPPAGGGKLMTIMQIHKDNEADEGIQRQAALLAFSSFKELKTVFL VDED  
ERA KAI PGKVTNVYNPPAGGGKLMSTILQIHKESEADEGIQRQAAILLALSAFKEKLTVIL VDDD  
SGA KAI PGKVLNVYNPPAGGGKLMTIMQIRKENPADEGIQRQAALLAFSSFKELKTVIL VDED  
ECL EAI PGFLQNVYAHTAGGGKFLGILQVKKRQPSDEGRQQAALIALATYSELKNIIL VDED  
ACH RAMPGLLNVAHTAGGGKLLAVLQVAKRRPGDEGRQQAALIALAVYRELKNVIL VDED  
KIN KALPGFVKNVYAHSAGGGKLLAILQVCQRSAGDVGKARQAALIALAVYRELKNIIV VDDD  
ATR KALPGFVKNVYAHSAGGGKLLAILQVCQRSAGDAGKARQAALIALAVYRELKNIIV VDDD  
AGL TAI PGRLNVAHAAPCGGGKFVAVLQFKKSSINDEGRQRNAAMLAFSAFSELKHVFL VDED  
ERY KAMPGNVRNVHCASSGGGKYIAVLQFVKRMESDEGRQQAALLAFSAFSELKHVFL VDED  
COP KAMPGLQNVYCCASSGGGKYIAVMQFKKSVPSDEGRQQAALLAFSAFAELKHVFL VDED  
BLA KAMPGLQNVYCCASSGGGKYMAVLQFKKLSQSDEGRQQAALLAFSAFSELKNVFL VDED  
FIR KAMPGLQNVYCCASSGGGKYMAVLQFKKREASDEGRQQAALLAFSAFSELKHVFL VDED  
AHA KAMPGLQNVYCCASSGGGKYMAVLQFKKREASDEGRQQAALLAFSAFSELKHVFL VDED  
LAC KAMPGLQNVYCCASSGGGKYMAVLQFKKREASDEGRQQAALLAFSAFSELKHVFL VDED  
DLO KAMPGLQNVYCCASSGGGKYMAVLQFKKLTASDEGRQQAALLAFSAFSELKHVFL VDED  
IBA KAMPGLQNVYCCASSGGGKYMAVLQFKKSVASDEGRQQAALLAFSAFSELKNIFI VDED  
CBU KAMPGLQNVYCCASSGGGKFMAVLQFKKTVASDEGRQQAALLAFSAFSELKNIFL VDED  
HHA KALAGRVKNVYAHSSGGGKYMAVIQFAKQVPSDEGRQQAALIALTAFPELKHVIV VDED  
TSA RAMPGRVLNVYAHSSGGGKYLAAILQFKKSI PSDEGRQQAALVAFSAFPELKHVIL VDED  
PAG RALPGFVQNVHCPSPGTGKYLAIVLQVKKRFVAVDEGRQQAALLAFSAFSELKHVML VDED  
HAL RAMPGLLNVAHTAGGGKLLAVMVFQFKKSAPVDEGRQQAALLAFSAFSELKHVIL VDED  
SBL RAMPGLLNVAHTAGGGKLLAVMVFQFKKSSVNDDEGRQQAALLAFSAFPELKHVIL VDED  
KRA RAMPGLLNVAHTAGGGKLLAVMVFQFKKSSPADEGRQQAALLAFSAFPELKHVIL VDED  
KMI RAMPGLLNVAHTAGGGKLLAVLQFKKSSPADEGRQQAALLAFSAFPELKHVIL VDED  
\* : \* : \* . \* \* \* : : \* . : \* \* : \* \* : \* \* : \* \* : \* \* : \* \* : \*

LRH VDIF DMNDVVWTMNTREFQGDQDIMVLPGMRNHPLDP SERPQYDPKSI RVRGMSSKTVIDG  
LPL VDIF DMNDVIWTMNTREFQADQDIMVLSGMRNHPLDP SERPQYDPKSI RFRGMSSKLVIDG  
PET VDIF DMNDVVWTINTRFQADQDIMVLPGMRNHPLDP SERPEYDPKSI RTRGMSSKLVIDG  
ERA VDIF DMNDVMWTLNTRFQGDQDII VLPGMRNHPLDP SERPEYDPKSI RFRGMSSKTI LDG  
SGA VDIF DMNDVMWTINTRFQAHKDIMSLEGMRNHPLDP SERPEYSPEHIRVRGMSSKLVLDG  
ECL VDIF DSDDILWAMTTRMQGDVSTITTLPGIRGHQLDPSQSPDYST-SIRNGISCKTIFDC  
ACH VDPF DSDDVLWAMQTRYQGDVDTIFVPGVPGHVLDPSQVPEYSP-SIAARGLTCKTIFDC  
KIN VDLE DSNDVLWAMQTRYQGNVDTMFLPGVTGHVLDPSQVPEYDP-SIPAKGVSCKTIFDC  
ATR VDLE DSNDVLWAMQTRYQGNVDTMFLPGVTGHVLDPSQVPDYDP-SIPAKGVSCKTIFDC  
AGL VDIF DMSDVMWAMTTRFQADTGLITIPGAHCHVLDPSNDPAFAP-SIRVHGIACKAIFDC  
ERY VDIY DMKDVLWAMTTRFQSDIDCISIPGVRCHPLDPSNDTTYDP-SIRDARGIACKTIFDC  
COP VDPF DMKDVMWAMTTRFQADLDLITIPGVQCHPLDPSNQPEYSA-HIRARGIACKAIFDC  
BLA VDCE DMNDVLWAMNTRFQGDVDVITIPGVRCHPLDPSNDPAFSP-SIRDHGIACKTIFDC  
FIR VDCE DMNDVLWAMNTRFQGDADIITIPGVRCHPLDPSNDPTCSP-SIRDHGIACKTIFDC  
AHA VDCE DMNDVLWAMNTRFQGDADIITIPGVRCHPLDPSNDPTCSS-SIRDHGIACKTIFDC  
LAC VDCE DMNDVLWAMNTRFQGDADIITIPGVRCHPLDPSNDPTCSS-SIRDHGIACKTIFDC  
DLO VDCE DMNDVLWAMNTRFQGDADIITIPGVRCHPLDPSNDPSCSG-SIRDHGIACKTIFDC  
IBA VDCE DMNDVLWAMNTRFQGDVDVITIPGVRCHPLDPSNDPSPFSP-SIRDHGIACKTIFDC  
CBU VDCE DMNDVLWAMNTRFQGDADIITIPGVRCHPLDPSNDPDYSP-SIKNHGIACKTIFDC  
HHA VDIF DSDDVLWALNTRYQGDVDTITIPGVRCHPLDPTEGPEYNP-MLKDRGISCKTIFDC  
TSA VDIF DSNDVLWALNTRYQGDLDTVFIPGVRCHPLDPSNNLYHP-SILSTGIACKTIYDC  
PAG VDVF DLSDVMWAMTTRYQGDVSTVFIPGVRCHPLDPSNDPAFSP-SVRDHGITCKTIFDC  
HAL VDIF DSDDVMWAMQTRYQGDVDTVFIPGVRCHPLDPSQMPDYSP-SILOEGMSCKTIFDC  
SBL VDIF DTDDVLWAMQTRYQGDIDTITIPGVRCHPLDPSQVPEYSP-FITQQGMTCKTIFDC  
KRA VDIF DSDDVLWAMQTRYQGDVDTVTIPGVRCHPLDPSQIPAYSP-SILOQGMCKTLFDC  
KMI VDIF DSDDVLWAMQTRYQGDVDTIVIPGVRCHPLDPSQVPEYSP-SILOQGMCKTIFDC  
\* \* : \* . \* \* \* : : \* . : \* \* : \* \* : \* \* : \* \* : \* \* : \* \* : \*

```

LRH      TVPFDMRDQFKRAAFKKVS--DWQKYLK-----
LPL      TVPFDMKDQFERAQFMKVA--DWEKYLK-----
PET      TVPFDMKDQFERAQFKEVK--DWEKYLK-----
ERA      TVPFDLKDDFIRAEEFKEVP--DWEKYLK-----
SGA      TVPFDMKDQFERAKFKEVP--DWKKYLD-----
ECL      TVPWALKARFERAPFMEVDPTPWAPPELFSDDK-
ACH      TAPWHLRERFERAKFRDVPDHPFAPPELFPQARS
KIN      TYPWKLKEHFVRAQFRDVPDHPFAPSIFPKAGM
ATR      TYPWKLKEHFVRAQFREVDHPFAPSIFPKAGM
AGL      TYPYDLKDEFQRCRFLDIDQDKWAAELAH----
ERY      TVPFSQKERFQRAAFQVEEASQWLK-----
COP      TVPFDQKARFERAKFMDVDPKCWLPDMLK----
BLA      TVPYDLKEDFHRARFMELDPEKWLKK-----
FIR      TVPYDQKERFKRARFMEVDPEHWL-----
AHA      TVPYDQKERFKRARFMEVDPEHWLS-----
LAC      TVPYDQKERFKRARFMEVDPEHWLS-----
DLO      TVPYDQKDRFKRAQFMDVDPEHWVK-----
IBA      TVPFEQKERFKRARFMDVDPEHWLKDIDK-----
CBU      TVPFHMKERFKRAKFMVDPEHWL-----
HHA      TVPYGLKDRFQRSKFKEVNMEDEIRPLV----
TSA      TVPFIQKERFKRSSFKEVNLSYDIDKPLK----
PAG      TVPYNLKANFHRSEFLEVDVNRFI PGFNQK---
HAL      TVPFHLKAHFERSRFKEADVVKRFLPDFE-----
SBL      TVPFHLKTHFERSTFKEVDVKRFLPDFE-----
KRA      TVPFHLKSHFERSKFKEVDVKRFLPDFE-----
KMI      TVPFHLKHTFQRSRFKEVDVKRFLPDFE-----
* *: : * *. * . :

```

**FIG S2.** Comparison of amino acid sequences of subunit C of putative gallate decarboxylase proteins from bacteria identified by HTS from athlete faecal microbiota. Multiple alignments were done using the programs ClustalOmega after retrieval of sequences from BLAST homology searches. The C subunits are from *Acetobacter tropicalis* (ATR) (WP\_006559787.1), *Actinomyces glycerinitolerans* (AGL) (WP\_073329259.1), *Anaerostipes hadrus* (AHA) (WP\_009204323.1), *Azotobacter chroococcum* (ACH) (WP\_052264016.1), *Blautia* sp. KLE 1732 (BLA) (WP\_021650680.1), *Clostridium butyricum* (CBU) (WP\_058371993.1), *Coprobacillus* (COP) (WP\_008787659.1), *Dorea longicatena* CAG:42 (DLO) (CDE20644.1), *Enterobacter cloacae* subsp. *cloacae* ATCC 13047 (ECL) (YP\_003612445.1), *Enterococcus* (ERA) (WP\_010743655.1), *Erysipelotrichaceae* bacterium 3\_1\_53 (ERY) (EFP59895.1), Firmicutes bacterium CAG:270 (FIR) (CDD72954), *Hafnia*

*alvei* ATCC 51873 (HAL) (WP\_004092226.1), *Hungatella hathewayi* (HHA) (WP\_006771947.1), *Intestinibacter bartlettii* (IBA) (WP\_007285641.1), *Klebsiella michiganensis* KCTC 1686 (KMI) (AEX02211.1), *Komagataeibacter intermedius* (KIN) (WP\_039733191.1), *Kosakonia* (KRA) (WP\_071921386.1), *Lachnospiraceae* bacterium 5\_163FAA (LAC) (EFV16561), *Lactobacillus rhamnosus* (LRH) (WP\_005712295.1), *Lactobacillus plantarum* ATCC 14917T (LPL) (D7VDD5), *Pantoea agglomerans* strain FDAARGOS\_160 (PAG) (AMG60167.1), *Pediococcus ethanolidurans* (PET) (WP\_057806460.1), *Shimwellia blattae* (SBL) (WP\_002441866.1), *Streptococcus* (SGA) (WP\_003065832.1), and *Turicibacter sanguinis* (TSA) (WP\_040763984.1). Residues that are identical (\*), conserved (:) or semiconserved (.) in all sequences are indicated. Dashes indicated gaps introduced to maximize similarities. Degenerate primers were designed on the conserved domains highlighted.
